# Supplementary figures and images for: Fisetin Inhibits Osteogenic Differentiation of Mesenchymal Stem Cells via the Inhibition of YAP
Source: MDPI journal article supplement (doi:10.3390/antiox10060879), 2021-05-30

Lorthongpanich\_Sup\_Fig 1

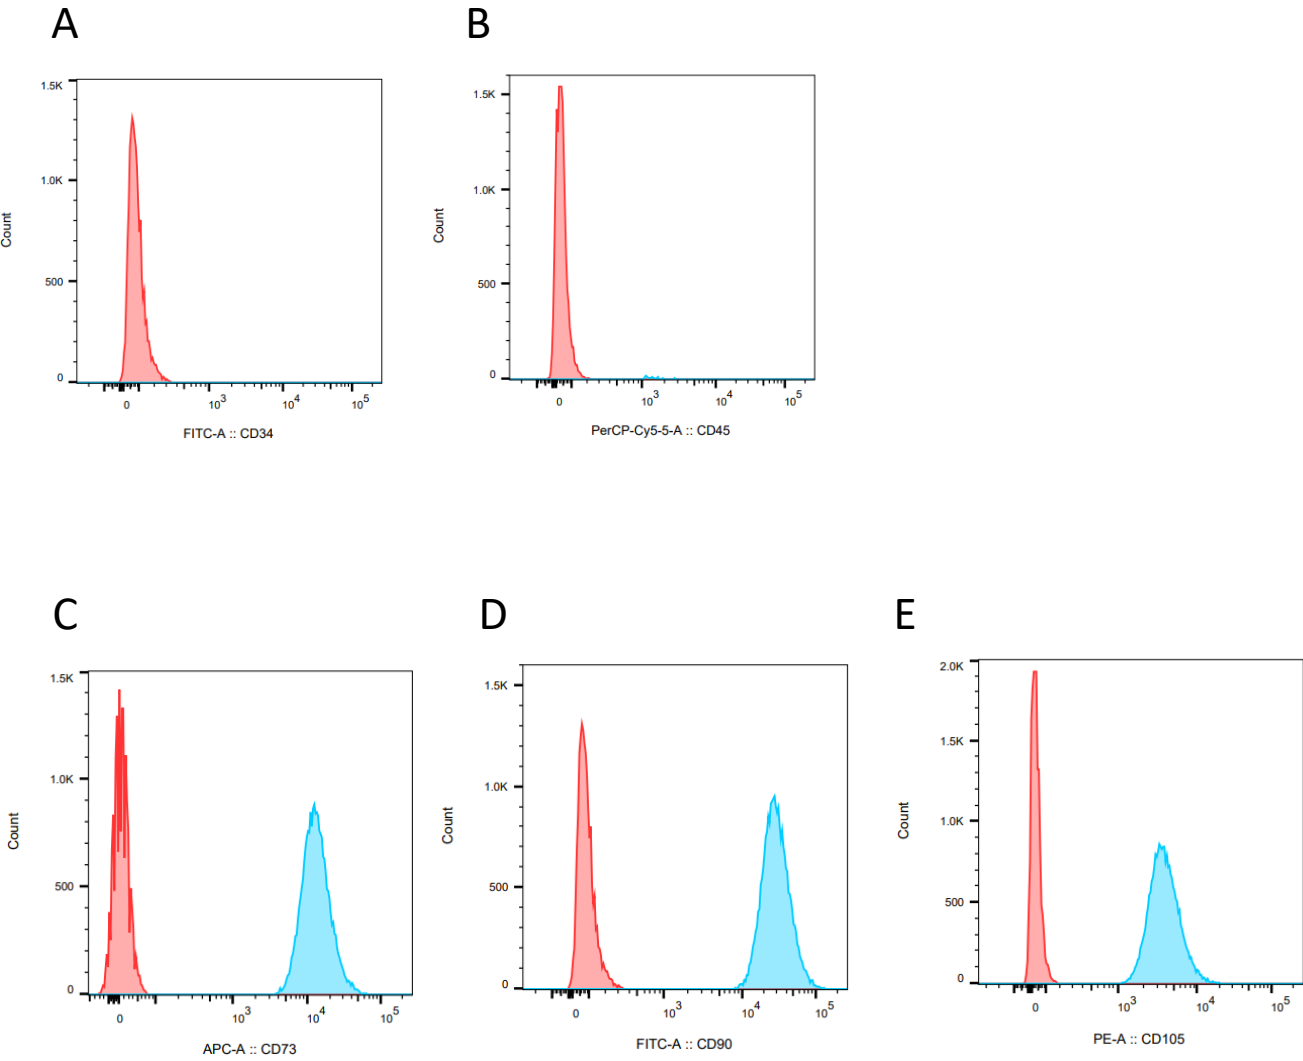

Lorthongpanich\_Sup\_Fig 2

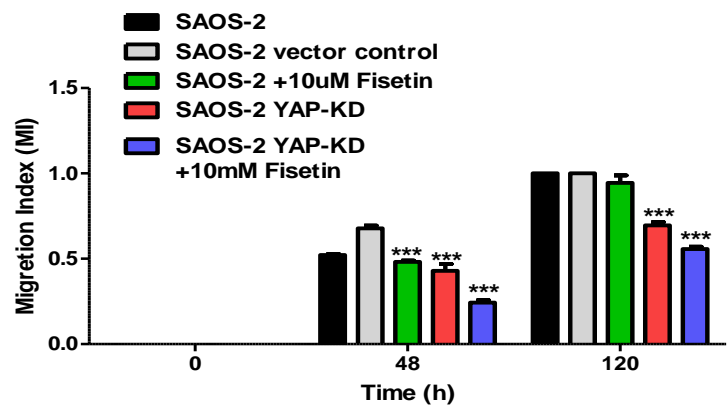

Lorthongpanich\_Sup\_Fig 3

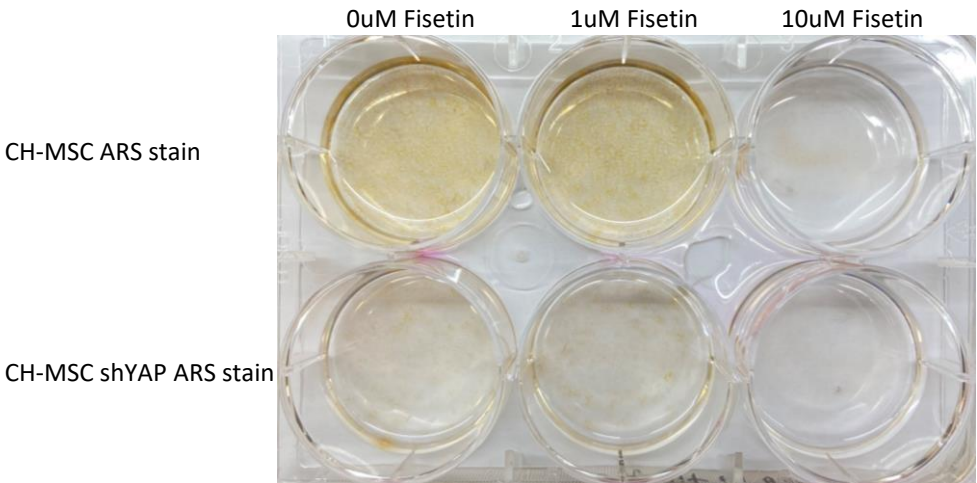

Supplement: s1 [file s1]
